# Supplementary material for: Synthesis of magnetically separable Fe3O4–Au–CdS kinked heterotrimers incorporating plasmonic and semiconducting functionalities
Source: Royal Society of Chemistry journal article supplement (doi:10.1039/c9tc03538a), 2019-01-01
Supplement: c9tc03538a1.pdf [file c9tc03538a1.pdf]

**Supporting Information:**

**Synthesis of magnetically separable Fe<sub>3</sub>O<sub>4</sub>-Au-CdS kinked heterotrimers incorporating plasmonic and semiconducting functionalities**

Shaghraf Javaid<sup>a</sup>, Xiaojie Li<sup>b,c</sup>, Fei Wang<sup>a</sup>, Wei Chen<sup>a</sup>, Yingping Pang<sup>a</sup>, Shaobin Wang<sup>b,c</sup>, Guohua Jia<sup>a\*</sup> and Franca Jones<sup>a\*</sup>

a. Curtin Institute of Functional Molecules and Interfaces, School of Molecular and Life Sciences Curtin University, Bentley, Perth WA, 6102, Australia. Email: F.Jones@curtin.edu.au, guohua.jia@curtin.edu.au

b. Department of Chemical Engineering, Curtin University, Bentley, Perth WA, 6102, Australia.

c. School of Chemical Engineering, The University of Adelaide, Adelaide SA 5005, Australia.

\* Corresponding author: [guohua.jia@curtin.edu.au](mailto:guohua.jia@curtin.edu.au); F.Jones@curtin.edu.au

**X-ray photoelectron spectroscopy (XPS) measurements:** The XPS measurements were performed on a Kratos Axis Ultra DLD spectrometer equipped with a monochromatic AlK $\alpha$  (1486.6 eV) irradiation source operating at an X-ray gun power of 150 W. The vacuum pressure of the analysis chamber was maintained at  $8 \times 10^{-9}$  Torr or lower throughout the analyses. The scale of binding energy was calibrated for each sample by setting the main line of the C 1s spectrum to 284.8 eV. XPS spectra were collected with 160 eV pass energy for the survey spectra and 40 eV for the high-resolution spectra, respectively. Background subtraction using a Shirley background was applied to all survey and high-resolution spectra. Each high-resolution spectra was fitted with a Gaussian-Lorentzian (70-30 %) line shape with the full-width half maximum (FWHM) constrained to values considered reasonable for each of the element.

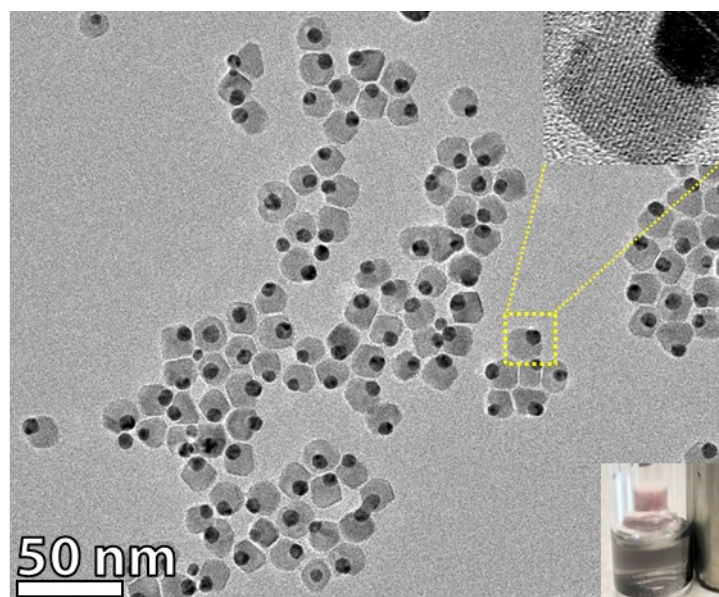

**Figure S1.** TEM image of Au-Fe<sub>3</sub>O<sub>4</sub> dimer seed. Top and bottom right insets show its HRTEM and magnetic separation, respectively.

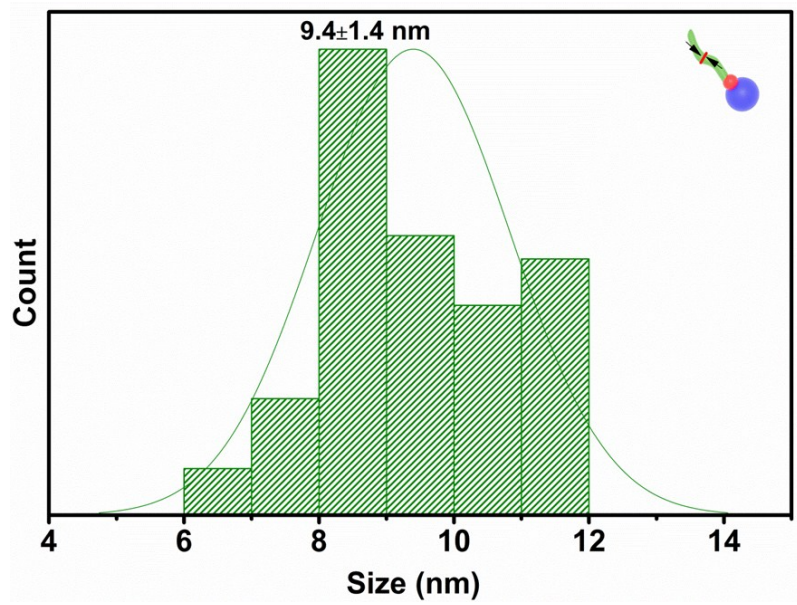

**Figure S2.** Size distribution curve of the diameter of kinked CdS nanorods.

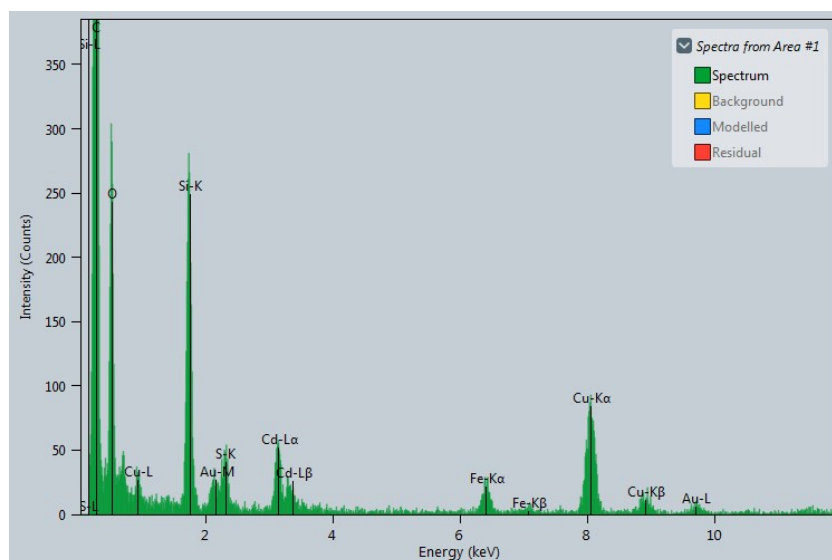

**Figure S3.** EDS spectra of Fe<sub>3</sub>O<sub>4</sub>-Au-CdS heterotrimer obtained at 260 °C after 6 mins, corresponding to Figure 1 c1-c2.

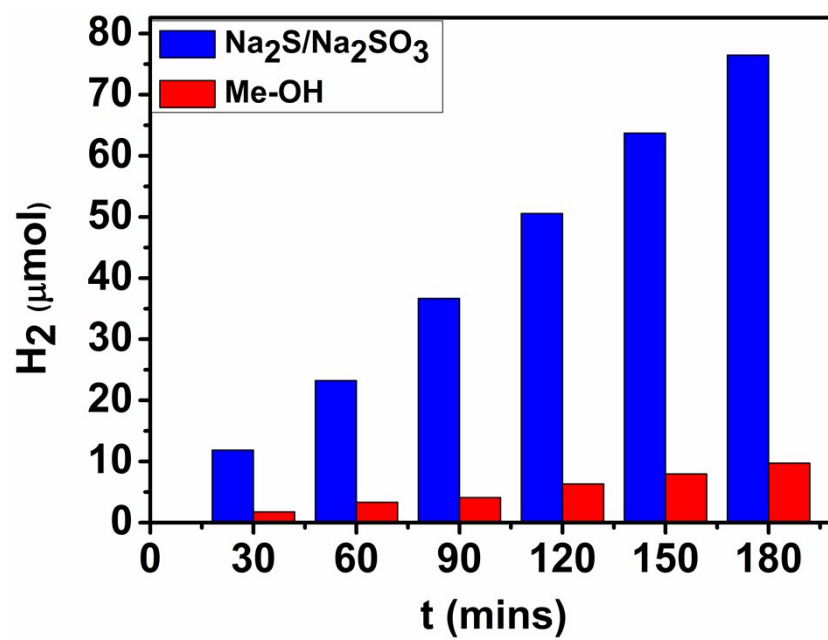

**Figure S4.** Comparison of the photocatalytic activity of Fe<sub>3</sub>O<sub>4</sub>-Au-CdS heterotrimer in the presence of Na<sub>2</sub>S/Na<sub>2</sub>SO<sub>3</sub> and Me-OH as sacrificial agents.

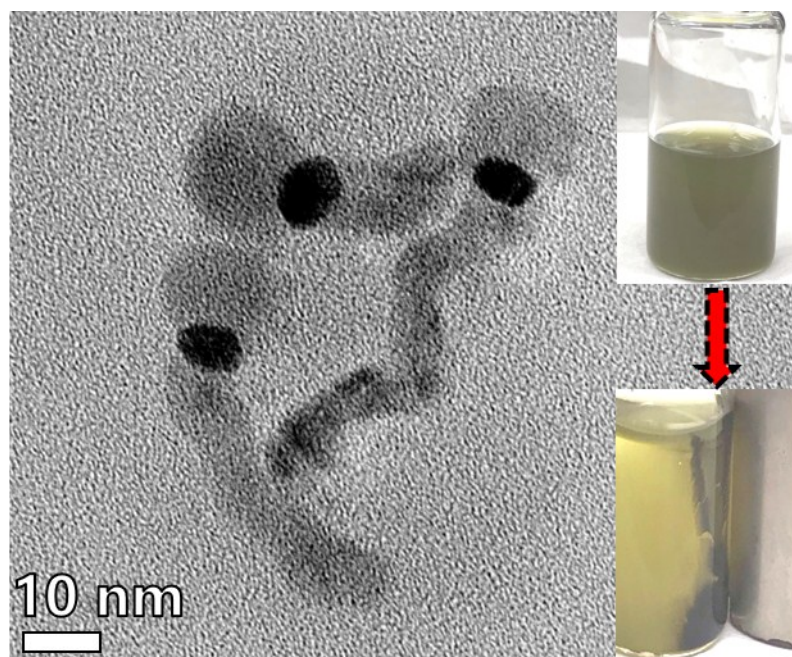

**Figure S5.** TEM image of the heterotrimer catalyst,  $\text{Fe}_3\text{O}_4\text{-Au-CdS}$  with an inset showing its response towards an external magnet.

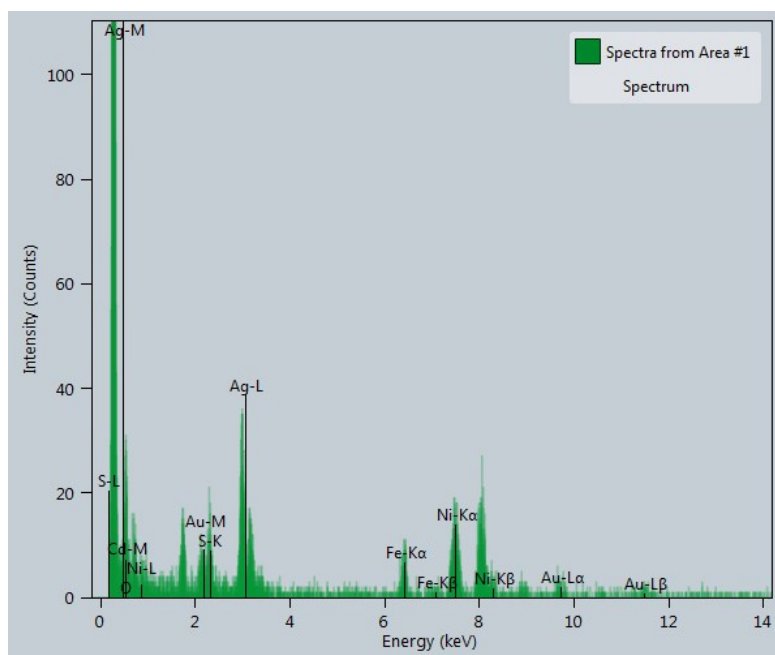

**Figure S6.** EDS spectra of  $\text{Fe}_3\text{O}_4\text{-Au-Ag}_2\text{S}$  heterotrimer, corresponding to Figure 6b.



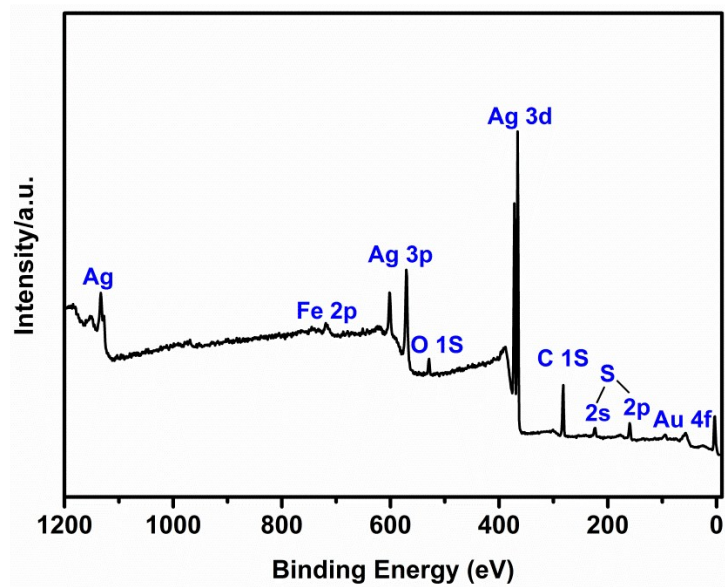

**Figure S7.** XPS survey spectra of  $\text{Fe}_3\text{O}_4\text{-Au-Ag}_2\text{S}$ , corresponding to Figure 6h.

**Table S1 Photocatalytic activity of Fe<sub>3</sub>O<sub>4</sub>-Au-CdS in comparison with literature reports.**

| Hybrid System                           | H <sub>2</sub> evolution (μmol) | Ref          |
|-----------------------------------------|---------------------------------|--------------|
| Au@TiO <sub>2</sub> -CdS                | 11                              | 1            |
| Fe <sub>3</sub> O <sub>4</sub> -CdS-Ni  | 18                              | 2            |
| In <sub>2</sub> O <sub>3</sub> /Au/CdS  | 17.23                           | 3            |
| Au NR-TiO <sub>2</sub>                  | 11.6                            | 4            |
| Fe <sub>3</sub> O <sub>4</sub> -CdSe-Au | 40                              | 2            |
| ZnS(CdS/Au)                             | 36.5                            | 5            |
| Fe <sub>3</sub> O <sub>4</sub> -ZnS-Au  | 12                              | 2            |
| Ag-Ag <sub>2</sub> S-CdS NPs            | 40                              | 6            |
| Fe <sub>3</sub> O <sub>4</sub> -Au-CdS  | 76                              | Present work |

## References

1. J. Fang, L. Xu, Z. Zhang, Y. Yuan, S. Cao, Z. Wang, L. Yin, Y. Liao and C. Xue, Au@TiO<sub>2</sub>-CdS Ternary Nanostructures for Efficient Visible-Light-Driven Hydrogen Generation, *ACS Appl. Mater. Interfaces*, 2013, **5**, 8088-8092.
2. F. Pang, R. Zhang, D. Lan and J. Ge, Synthesis of Magnetite-Semiconductor-Metal Trimer Nanoparticles through Functional Modular Assembly: A Magnetically Separable Photocatalyst with Photothermic Enhancement for Water Reduction, *ACS Appl. Mater. Interfaces*, 2018, **10**, 4929-4936.
3. D. Ma, J.-W. Shi, D. Sun, Y. Zou, L. Cheng, C. He, Z. Wang and C. Niu, Au Nanoparticle and CdS Quantum Dot Codecoration of In<sub>2</sub>O<sub>3</sub> Nanosheets for Improved H<sub>2</sub> Evolution Resulting from Efficient Light Harvesting and Charge Transfer, *ACS Sustain Chem. Eng.* 2019, **7**, 547-557.
4. B. Wu, D. Liu, S. Mubeen, T. T. Chuong, M. Moskovits and G. D. Stucky, Anisotropic Growth of TiO<sub>2</sub> onto Gold Nanorods for Plasmon-Enhanced Hydrogen Production from Water Reduction, *J. Am. Chem. Soc.*, 2016, **138**, 1114-1117.
5. T.-T. Zhuang, Y. Liu, M. Sun, S.-L. Jiang, M.-W. Zhang, X.-C. Wang, Q. Zhang, J. Jiang and S.-H. Yu, A Unique Ternary Semiconductor-(Semiconductor/Metal) Nano-Architecture for Efficient Photocatalytic Hydrogen Evolution, *Angew. Chem. Int. Ed.*, 2015, **54**, 11495-11500.
6. T. Kawawaki, T. Nakagawa, M. Sakamoto and T. Teranishi, Carrier-Selective Blocking Layer Synergistically Improves the Plasmonic Enhancement Effect, *J. Am. Chem. Soc.*, 2019, **141**, 8402-8406.
